# Supplementary material
Source: bioRxiv or medRxiv preprint supplement (https://www.biorxiv.org/highwire/filestream/15371/field_highwire_adjunct_files/1/055921-10.pdf)
Supplement: Supplementary file [file 055921-10.pdf]

**Table S1:** Sequencing and alignment of PRO-seq libraries.

For each replicate, the total number of reads sequenced, number of reads that passed filter, number of reads after clipping, number of reads that did not align to the ribosomal genes, and number of reads that aligned uniquely to the dm3 reference genome are shown in the table.

| Library                | Total reads | Passed filter | After clipping | Non-ribosomal | Mapped reads |
|------------------------|-------------|---------------|----------------|---------------|--------------|
| LacZ_RNAi_NHS_rep1     | 22002207    | 20498005      | 18857033       | 14282348      | 9443330      |
| LacZ_RNAi_NHS_rep2     | 45852143    | 42614140      | 37948992       | 29125104      | 19052661     |
| LacZ_RNAi_20minHS_rep1 | 38149191    | 35411265      | 32429537       | 26063433      | 12372995     |
| LacZ_RNAi_20minHS_rep2 | 48224407    | 44752452      | 39159654       | 30083167      | 13759500     |
| GAF_RNAi_NHS_rep1      | 30007019    | 27839237      | 25783567       | 18298791      | 11898316     |
| GAF_RNAi_NHS_rep2      | 29223336    | 27156681      | 24128417       | 18720462      | 12469522     |
| GAF_RNAi_20minHS_rep1  | 33083184    | 30743186      | 27869887       | 19884430      | 9288339      |
| GAF_RNAi_20minHS_rep2  | 26900768    | 24906543      | 20804594       | 15242537      | 6899682      |
| HSF_RNAi_NHS_rep1      | 31620891    | 29340277      | 26783955       | 19754947      | 12848598     |
| HSF_RNAi_NHS_rep2      | 20661822    | 19223633      | 16847824       | 13244247      | 8850116      |
| HSF_RNAi_20minHS_rep1  | 20303622    | 18904152      | 17287939       | 11342865      | 5292065      |
| HSF_RNAi_20minHS_rep2  | 44198627    | 40832316      | 33567347       | 22388032      | 10971965     |
| NHS_rep1               | 33326090    | 27513854      | 24770885       | 23263961      | 12081666     |
| NHS_rep2               | 40386025    | 34851525      | 33127425       | 31427515      | 17083774     |
| 30secHS_rep1           | 32103863    | 26577493      | 24398076       | 23568732      | 13946293     |
| 30secHS_rep2           | 43868016    | 37825590      | 35476506       | 34014449      | 20066701     |
| 2minHS_rep1            | 29483939    | 24279233      | 21513613       | 20261645      | 12280319     |
| 2minHS_rep2            | 58929589    | 52883653      | 49114894       | 45522711      | 25046895     |
| 5minHS_rep1            | 26685698    | 22026373      | 20040132       | 18839288      | 10202616     |
| 5minHS_rep2            | 49420574    | 42648406      | 39527809       | 34244700      | 18258123     |
| 10minHS_rep1           | 31518051    | 26025041      | 23770378       | 22787845      | 10255055     |
| 10minHS_rep2           | 36364173    | 32508148      | 30318974       | 28531182      | 13973044     |
| 20minHS_rep1           | 53294616    | 47669950      | 44625103       | 42605985      | 19333234     |
| 20minHS_rep2           | 28918287    | 25102563      | 23838584       | 23118980      | 9322488      |
